# Supplementary material for: The diagnostic value of PET/CT imaging with the 68Ga-labelled PSMA ligand HBED-CC in the diagnosis of recurrent prostate cancer
Source: PubMed Central journal article supplement (PMC4315487; doi:10.1007/s00259-014-2949-6), 2014-11-20
Supplement: 259_2014_2949_MOESM1_ESM.pdf [file 259_2014_2949_MOESM1_ESM.pdf]

**Supplementary Table 1** patients characteristics. Red rows indicate non-pathologic <sup>68</sup>Ga-PSMA-PET/CTs. GSC Gleason Score; PSA-DT PSA doubling-time; PEx prostatectomy; Rx radiation therapy of the prostate gland or prostate fossa after prostatectomy; ADT androgen deprivation therapy.

| Patient no. | Age (y) | PET dd/mm/yy | Tracer (MBq) | GSC | PSA at PET ng/ml | PSA-DT (days) | PEx  | TNM                     | Rx  | ADT |
|-------------|---------|--------------|--------------|-----|------------------|---------------|------|-------------------------|-----|-----|
| 1           | 76      | 24.05.2011   | 114          | 7   | n/a              | n/a           | yes  | pT2a pN0 M0             | yes | no  |
| 2           | 79      | 08.06.2011   | 100          | 8   | n/a              | n/a           | no   | T2c                     | yes | no  |
| 3           | 66      | 15.06.2011   | 149          | 5   | 1.50             | 84            | yes  | pT3a pN0 M0 R1          | yes | no  |
| 4           | 67      | 06.07.2011   | 111          | 7   | 7.40             | n/a           | nein | T4                      | yes | no  |
| 5           | 60      | 07.07.2011   | 100          | 9   | 5.56             | 240           | yes  | pT3 pN1 (6/25)          | no  | yes |
| 6           | 75      | 19.07.2011   | 68           | 8   | 2.67             | 150           | yes  | pT2a pN0 R0 G3          | yes | no  |
| 7           | 68      | 21.07.2011   | 68           | 7   | 3.20             | 484           | yes  | n/a                     | no  | no  |
| 8           | 71      | 04.08.2011   | 132          | 7   | 3.20             | n/a           | no   | T1c Nx Mx               | yes | no  |
| 9           | 67      | 09.08.2011   | 120          | 7   | 1.13             | 74            | yes  | pT2c pN0 (0/23) R1      | no  | no  |
| 10          | 76      | 11.08.2011   | 118          | 7   | 2.63             | n/a           | yes  | pT2c pN0 G3 R0          | no  | no  |
| 11          | 64      | 08.09.2011   | 120          | 8   | 0.03             | n/a           | yes  | pT2c pN0/1 L0 Pn0 R1    | no  | no  |
| 12          | 73      | 12.09.2011   | 96           | 7   | 2.00             | n/a           | yes  | pT3a N0 M0              | yes | no  |
| 13          | 67      | 19.09.2011   | 105          | 9   | 36.00            | 141           | yes  | n/a                     | no  | no  |
| 14          | 67      | 28.09.2011   | 111          | 9   | 1.20             | n/a           | yes  | pT3b, pN1(9/45), G3, R1 | yes | no  |
| 15          | 67      | 10.10.2011   | 52           | 9   | 1.80             | n/a           | yes  | pT3b pN0 L1 G3          | yes | no  |
| 16          | 70      | 24.10.2011   | 90           | 7   | 1.00             | 454           | yes  | pT3a pN0 M0 R0          | yes | no  |
| 17          | 71      | 04.11.2011   | 116          | 5   | 5.60             | 72            | no   | pT1c                    | no  | no  |
| 18          | 72      | 08.11.2011   | 139          | 6   | 7.40             | n/a           | no   | cT2a N0 M0              | yes | no  |
| 19          | 72      | 09.11.2011   | 177          | 9   | 3.58             | 134           | no   | n/a                     | yes | yes |
| 20          | 64      | 10.11.2011   | 81           | 8   | 334.00           | 183           | yes  | pT3, pN1, pMx, R1       | yes | no  |
| 21          | 73      | 11.11.2011   | 144          | 7   | 985.00           | 18            | yes  | pT2a N1 (1/15) pMx G3a  | no  | no  |
| 22          | 65      | 16.11.2011   | 123          | 7   | n/a              | n/a           | yes  | pT2c, pN0, M0, R0, G3   | yes | yes |
| 23          | 51      | 17.11.2011   | 148          | 6   | 1.20             | n/a           | yes  | pT2b Nx M0              | yes | yes |
| 24          | 67      | 23.11.2011   | 68           | 9   | 9.60             | n/a           | yes  | cT4 cN+ Mx              | yes | yes |
| 25          | 61      | 24.11.2011   | 152          | 7   | 0.10             | n/a           | yes  | pT3a pN0 M1             | no  | no  |
| 26          | 74      | 25.11.2011   | 169          | 8   | 20.06            | 3261          | yes  | n/a                     | no  | no  |
| 27          | 70      | 07.12.2011   | 350          | 9   | 1.06             | n/a           | yes  | T4 N0 M0 pR1            | n/a | no  |
| 28          | 78      | 08.12.2011   | 182          | 7   | 7.46             | 276           | yes  | pT3b, pN0, G3a          | yes | no  |
| 29          | 85      | 09.12.2011   | 93           | 7   | 2.59             | 587           | no   | pT2c N0 M0              | yes | no  |
| 30          | 70      | 13.12.2011   | 172          | 7   | 4.90             | 98            | yes  | pT3a, pN0 (0/4), R0     | yes | no  |
| 31          | 73      | 16.12.2011   | 133          | 7   | n/a              | n/a           | yes  | pT3 N1 R1 L1            | yes | no  |
| 32          | 55      | 21.12.2011   | 103          | 9   | 148.00           | 250           | yes  | pT3B N 1 , M1           | yes | yes |
| 33          | 69      | 22.12.2011   | 117          | 7   | 7.40             | 487           | yes  | pT3b pN0 R1             | yes | no  |
| 34          | 72      | 10.01.2012   | 96           | 9   | 4.80             | n/a           | yes  | pT3 pN0 M0              | yes | yes |
| 35          | 74      | 11.01.2012   | 82           | 8   | 0.04             | n/a           | yes  | pT3a pN0 (0/7) M0       | yes | no  |
| 36          | 66      | 18.01.2012   | 96           | 9   | 0.01             | n/a           | yes  | pT3b pN0                | no  | yes |
| 37          | 75      | 24.01.2012   | 52           | 5   | 11.90            | 47            | no   | n/a                     | yes | yes |
| 38          | 71      | 25.01.2012   | 76           | 6   | 0.40             | n/a           | no   | n/a                     | yes | yes |
| 39          | 55      | 26.01.2012   | 44           | 9   | 9.54             | n/a           | yes  | pT3b pN1 (6/11) R0      | no  | yes |
| 40          | 72      | 26.01.2012   | 40           | n/a | 13.80            | 450           | yes  | n/a                     | yes | yes |
| 41          | 70      | 27.01.2012   | 130          | 7   | 31.00            | n/a           | yes  | pT3 pN0 M0 L1           | yes | yes |

|    |    |            |     |     |        |     |     |                        |     |     |
|----|----|------------|-----|-----|--------|-----|-----|------------------------|-----|-----|
| 42 | 56 | 31.01.2012 | 109 | 9   | 28.20  | n/a | yes | cT3a cN0 M0            | yes | yes |
| 43 | 73 | 02.02.2012 | 218 | 6   | 122.00 | 15  | yes | pT3 pN0 M0             | yes | no  |
| 44 | 48 | 03.02.2012 | 165 | 8   | n/a    | n/a | yes | pT2c pN1               | yes | no  |
| 45 | 61 | 07.02.2012 | 59  | 8   | 1.98   | 24  | yes | pT3b pN0 R1 G3         | no  | no  |
| 46 | 65 | 15.02.2012 | 185 | 9   | 7.08   | n/a | yes | cT2 N0 M1              | no  | yes |
| 47 | 70 | 16.02.2012 | 200 | 7   | 0.46   | 26  | yes | pT3b                   | yes | no  |
| 48 | 86 | 17.02.2012 | 119 | 8   | 2.90   | 207 | no  | T1c Nx Mx              | yes | no  |
| 49 | 63 | 22.02.2012 | 107 | 9   | 0.10   | n/a | yes | pT3a pN0 (0/10) M0     | yes | no  |
| 50 | 72 | 23.02.2012 | 130 | 8   | 3.30   | 497 | yes | pT2a pN0 M0            | yes | no  |
| 51 | 65 | 24.02.2012 | 212 | 6   | 11.20  | n/a | no  | n/a                    | no  | no  |
| 52 | 61 | 28.02.2012 | 65  | 7   | 1.72   | 125 | yes | pT3b pN0 M0 G3         | no  | no  |
| 53 | 67 | 29.02.2012 | 148 | 7   | 0.10   | n/a | yes | pT2c pN0 (0/21) cM0 G3 | yes | no  |
| 54 | 70 | 02.03.2012 | 135 | n/a | 20.10  | n/a | no  | n/a                    | no  | no  |
| 55 | 72 | 09.03.2012 | 79  | 8   | 10.60  | 440 | yes | pT3a pN0(0/10) M0      | no  | no  |
| 56 | 58 | 14.03.2012 | 67  | 9   | 2.35   | n/a | yes | pT3b pN0 L1 V0 R0      | yes | no  |
| 57 | 68 | 15.03.2012 | 61  | 7   | 6.34   | 69  | yes | ypT3b pN1(5/35) R0     | no  | no  |
| 58 | 81 | 16.03.2012 | 103 | 7   | 116.00 | n/a | yes | pT1cG3pN0              | yes | no  |
| 59 | 61 | 21.03.2012 | 85  | 9   | 2.22   | 124 | yes | pT2b, N0, M0, G3       | yes | no  |
| 60 | 81 | 23.03.2012 | 148 | 7   | 14.60  | n/a | no  | T1c N0 Mx              | yes | no  |
| 61 | 75 | 27.03.2012 | 240 | 7   | 80.30  | 62  | no  | T1c N0 M0              | yes | no  |
| 62 | 64 | 28.03.2012 | 167 | 9   | 146.00 | n/a | no  | T4 N2 M2               | yes | yes |
| 63 | 67 | 30.03.2012 | 175 | 8   | 2.81   | 23  | yes | pT2c pN0 R0            | no  | no  |
| 64 | 62 | 03.04.2012 | 142 | 9   | 3.78   | 164 | yes | pT4, pN1(7/25)         | yes | yes |
| 65 | 62 | 04.04.2012 | 161 | 7   | 0.10   | n/a | yes | pT3 pN0 R1             | no  | no  |
| 66 | 67 | 05.04.2012 | 150 | 6   | 31.80  | n/a | no  | n/a                    | no  | no  |
| 67 | 59 | 11.04.2012 | 154 | 9   | 4.21   | 22  | yes | pT2c pN0 R0            | yes | no  |
| 68 | 65 | 12.04.2012 | 227 | 7   | 0.48   | n/a | no  | n/a                    | no  | yes |
| 69 | 64 | 13.04.2012 | 232 | 8   | 0.10   | n/a | yes | pT2c pN0 pR0           | yes | yes |
| 70 | 70 | 18.04.2012 | 79  | 7   | 2.82   | 144 | yes | pT3b N0 M0 C61         | yes | no  |
| 71 | 61 | 19.04.2012 | 263 | 8   | 12.50  | 197 | yes | T2b C2 N0 M0 G3        | yes | yes |
| 72 | 69 | 20.04.2012 | 150 | 7   | 1.86   | n/a | yes | pT2 pN1                | yes | yes |
| 73 | 67 | 24.04.2012 | 182 | 9   | 6.47   | n/a | yes | pT3b pN1 G3 R0         | yes | no  |
| 74 | 75 | 25.04.2012 | 110 | 5   | 12.90  | n/a | no  | pT2b G2                | yes | yes |
| 75 | 69 | 26.04.2012 | 101 | 7   | 1.59   | 101 | yes | pT2 N1 M0 R1           | yes | no  |
| 76 | 76 | 02.12.2011 | 132 | 9   | 100.00 | n/a | yes | pT3a pN1 M0 G3 R0      | no  | no  |
| 77 | 76 | 04.05.2012 | 84  | 7   | 8.73   | n/a | yes | pT3a L1 V1 G3 M0 R0    | no  | no  |
| 78 | 76 | 09.05.2012 | 215 | 7   | 41.50  | n/a | yes | pT2 pN0 G2             | yes | no  |
| 79 | 68 | 14.05.2012 | 205 | 9   | 10.10  | n/a | yes | n/a                    | n/a | no  |
| 80 | 59 | 15.05.2012 | 139 | 9   | 4.90   | 164 | no  | n/a                    | no  | yes |
| 81 | 68 | 22.05.2012 | 77  | 7   | 6.59   | 58  | yes | pT3a pN0 M0            | yes | no  |
| 82 | 73 | 23.05.2012 | 144 | 10  | 2.46   | 75  | no  | n/a                    | yes | yes |
| 83 | 51 | 24.05.2012 | 188 | 9   | 176.00 | 75  | yes | n/a                    | no  | yes |
| 84 | 61 | 30.05.2012 | 76  | 7   | 4.22   | 124 | yes | pT3b N1 R1             | yes | no  |
| 85 | 57 | 01.06.2012 | 146 | 8   | 5.34   | 31  | yes | pT3a pN0 R1 G3         | yes | no  |
| 86 | 65 | 12.06.2012 | 164 | 7   | 0.30   | n/a | yes | pT2c pN0 cM0 V0 Pn1 R0 | no  | no  |
| 87 | 67 | 14.06.2012 | 127 | 7   | 6.95   | 19  | yes | pT2a,pN0 (0/13), R0    | yes | no  |
| 88 | 74 | 15.06.2012 | 130 | 8   | 61.30  | n/a | yes | pT3a Nx cM0 R1         | no  | no  |

|     |    |            |     |     |         |      |     |                          |     |     |
|-----|----|------------|-----|-----|---------|------|-----|--------------------------|-----|-----|
| 89  | 84 | 19.06.2012 | 99  | n/a | 2.61    | n/a  | no  | pT2 pN0 M0 G1            | yes | yes |
| 90  | 62 | 21.06.2012 | 88  | 7   | 1.15    | 419  | yes | pT2c pN0 (0) L0 V0 R0 G2 | yes | no  |
| 91  | 69 | 22.06.2012 | 180 | 7   | 60.30   | 49   | yes | R1 N+ (4/xx)             | yes | yes |
| 92  | 61 | 26.06.2012 | 138 | 7   | 2.24    | 39   | yes | pT3 pN0 G3               | yes | yes |
| 93  | 56 | 27.06.2012 | 172 | 7   | 0.91    | 190  | yes | pT3b pN0                 | yes | no  |
| 94  | 58 | 28.06.2012 | 166 | 7   | 1.34    | n/a  | yes | n/a                      | no  | no  |
| 95  | 71 | 26.06.2012 | 105 | 9   | 28.40   | 109  | yes | pT3b pN1R1               | no  | yes |
| 96  | 66 | 03.07.2012 | 111 | 10  | 139.00  | 55   | yes | pT3b pN1 pL1 pV0 R1      | no  | yes |
| 97  | 65 | 03.07.2012 | 257 | 9   | 0.10    | n/a  | yes | pT3b, pN1 (10/27) , R1   | no  | yes |
| 98  | 59 | 04.07.2012 | 257 | 9   | 4.14    | 93   | yes | pT3 N1 M0                | no  | no  |
| 99  | 74 | 06.07.2012 | 76  | 7   | 23.38   | 89   | yes | pT2c pN0 pMx R0          | yes | yes |
| 100 | 66 | 09.07.2012 | 151 | 8   | 12.70   | 2707 | no  | n/a                      | no  | no  |
| 101 | 70 | 09.07.2012 | 194 | 7   | 283.00  | n/a  | yes | pT3b pN1 (1/25) M0 R1    | yes | no  |
| 102 | 62 | 10.07.2012 | 104 | 7   | 3.17    | 59   | yes | pT3b pN1 (1/19) M0 L1    | yes | no  |
| 103 | 72 | 11.07.2012 | 285 | n/a | 33.00   | n/a  | yes | pT3b N0 M0 R1            | yes | yes |
| 104 | 71 | 12.07.2012 | 163 | 9   | 43.50   | n/a  | yes | cT4                      | yes | no  |
| 105 | 70 | 13.07.2012 | 150 | 8   | 258.00  | 36   | yes | pT2c pN0 R1              | yes | yes |
| 106 | 65 | 16.07.2012 | 159 | 10  | 7.01    | 1526 | no  | n/a                      | no  | no  |
| 107 | 69 | 16.07.2012 | 141 | 7   | 0.76    | 893  | yes | pT2 pN0 (0/22) M0        | no  | no  |
| 108 | 74 | 17.07.2012 | 106 | 7   | 4.98    | n/a  | no  | T1c G3                   | no  | yes |
| 109 | 63 | 19.07.2012 | 160 | 7   | 13.00   | 24   | yes | pT3b N0                  | yes | no  |
| 110 | 63 | 26.07.2012 | 220 | 9   | 265.00  | n/a  | no  | n/a                      | no  | yes |
| 111 | 57 | 31.07.2012 | 135 | 7   | 8.30    | n/a  | yes | pT3b pN0 R0              | no  | no  |
| 112 | 60 | 01.08.2012 | 136 | 7   | 10.30   | 40   | no  | T2a NX MX                | yes | no  |
| 113 | 57 | 06.08.2012 | 122 | 7   | 9.12    | n/a  | yes | cT3a                     | n/a | yes |
| 114 | 63 | 06.08.2012 | 118 | 7   | 5.60    | 118  | yes | pT3a pN0 M0              | yes | no  |
| 115 | 56 | 06.08.2012 | 133 | 7   | 1.69    | 66   | yes | pT3b pN0 L1              | yes | no  |
| 116 | 56 | 06.08.2012 | 156 | 7   | 9.40    | n/a  | yes | pT3a pN1 cM0 L1 V0 Pn0   | yes | no  |
| 117 | 77 | 07.08.2012 | 109 | 9   | 3.14    | 205  | yes | pT3 pN1 (1/20) L1 V0 R0  | yes | yes |
| 118 | 66 | 09.08.2012 | 97  | 8   | 445.00  | 37   | yes | pT2b pN0 cM0             | n/a | yes |
| 119 | 60 | 14.08.2012 | 105 | 7   | 57.90   | n/a  | yes | N1                       | yes | yes |
| 120 | 77 | 16.08.2012 | 76  | 8   | 1000.00 | n/a  | yes | G2b                      | n/a | yes |
| 121 | 73 | 20.08.2012 | 173 | 9   | 0.88    | n/a  | yes | T1c NX cM0               | yes | yes |
| 122 | 69 | 21.08.2012 | 97  | 7   | 13.90   | 490  | no  | T2b, cN0, cM0            | yes | no  |
| 123 | 73 | 11.09.2012 | 119 | 8   | 16.20   | 183  | no  | T1c NX cM0               | no  | no  |
| 124 | 66 | 12.09.2012 | 87  | 6   | 0.55    | 252  | no  | n/a                      | n/a | no  |
| 125 | 68 | 17.09.2012 | 154 | n/a | 2.00    | 593  | yes | n/a                      | no  | no  |
| 126 | 72 | 21.09.2012 | 183 | 7   | 7.00    | 117  | yes | pT3b pN0                 | yes | no  |
| 127 | 81 | 28.09.2012 | 120 | 7   | 7.39    | 970  | no  | T1c NX MX G2             | no  | no  |
| 128 | 63 | 02.10.2012 | 181 | 9   | 26.90   | n/a  | no  | pT3a pN0 R1              | yes | no  |
| 129 | 53 | 09.10.2012 | 207 | 9   | 0.15    | n/a  | yes | pT3, pN1                 | no  | yes |
| 130 | 71 | 10.10.2012 | 110 | 7   | 31.30   | n/a  | no  | n/a                      | no  | no  |
| 131 | 64 | 11.10.2012 | 141 | 7   | 0.19    | n/a  | yes | pT2c, pN0 (0/24)         | no  | no  |
| 132 | 69 | 12.10.2012 | 200 | 6   | 0.06    | n/a  | no  | n/a                      | yes | yes |
| 133 | 59 | 16.10.2012 | 152 | 7   | 7.60    | 219  | no  | n/a                      | yes | no  |
| 134 | 61 | 18.10.2012 | 148 | 8   | 8.55    | n/a  | yes | n/a                      | no  | no  |
| 135 | 51 | 19.10.2012 | 159 | 7   | 0.67    | 138  | yes | pT2c R0 N0 (0/19)        | yes | no  |

|     |    |            |     |     |       |     |      |                       |     |     |
|-----|----|------------|-----|-----|-------|-----|------|-----------------------|-----|-----|
| 136 | 72 | 22.10.2012 | 188 | n/a | 2.22  | 184 | yes  | pT2 pN0(0/7) cM0      | no  | no  |
| 137 | 76 | 23.10.2012 | 176 | 7   | 11.90 | n/a | yes  | pT2b pN0 L1 M0        | yes | no  |
| 138 | 56 | 24.10.2012 | 95  | n/a | 1.50  | n/a | yes  | n/a                   | no  | no  |
| 139 | 62 | 30.10.2012 | 235 | 7   | 0.46  | 118 | yes  | pT2b pN0 M0 R0        | yes | no  |
| 140 | 76 | 08.11.2012 | 118 | n/a | 6.31  | 151 | yes  | n/a                   | yes | no  |
| 141 | 63 | 09.11.2012 | 222 | n/a | 8.16  | 785 | no   | n/a                   | no  | no  |
| 142 | 71 | 14.11.2012 | 98  | n/a | 9.20  | 493 | no   | n/a                   | no  | no  |
| 143 | 58 | 19.11.2012 | 185 | 9   | 6.24  | 10  | yes  | pT3a, pN0 G3 L0 R1    | yes | no  |
| 144 | 63 | 20.11.2012 | 117 | 7   | 0.72  | 49  | yes  | pT2c pN1(0/12) R1     | no  | no  |
| 145 | 75 | 23.11.2012 | 190 | 9   | 9.38  | 10  | no   | T2 Nx M0 G2           | yes | yes |
| 146 | 75 | 28.11.2012 | 97  | 9   | 3.81  | 91  | yes  | pT3b pN1 M0 cM0       | yes | yes |
| 147 | 74 | 30.11.2012 | 188 | 7   | 7.86  | 85  | yes  | pT3b pN1(2/26) R1     | no  | yes |
| 148 | 54 | 05.12.2012 | 121 | 7   | 2.45  | 183 | yes  | n/a                   | no  | no  |
| 149 | 74 | 06.12.2012 | 148 | 7   | 3.77  | 74  | yes  | pT3a pN0 M0           | yes | no  |
| 150 | 62 | 12.12.2012 | 140 | 8   | 12.10 | n/a | no   | n/a                   | yes | no  |
| 151 | 79 | 13.12.2012 | 67  | 6   | 15.00 | 47  | yes  | pT3a pN0              | yes | no  |
| 152 | 63 | 17.12.2012 | 195 | 8   | 46.90 | 65  | no   | T3 N0 Mx              | no  | no  |
| 153 | 68 | 17.12.2012 | 260 | n/a | 13.60 | 469 | no   | n/a                   | no  | no  |
| 154 | 75 | 03.01.2013 | 297 | n/a | 3.49  | 259 | yes  | pT2a N0 M0 R0 G2      | no  | no  |
| 155 | 65 | 08.01.2013 | 170 | 6   | 4.59  | 372 | no   | T2a N0 M09            | yes | no  |
| 156 | 80 | 10.01.2013 | 123 | 7   | 5.55  | n/a | yes  | pT3b pN0 M0 G3        | no  | yes |
| 157 | 71 | 14.01.2013 | 160 | 8   | 1.13  | 44  | yes  | pT3a pN0 pMx G3 R0    | no  | no  |
| 158 | 69 | 15.01.2013 | 237 | 8   | 2.39  | 14  | yes  | pT3b N1 (3/28) L1 R0  | yes | no  |
| 159 | 77 | 15.01.2013 | 87  | 5   | 2.50  | 354 | yes  | pT2a R0 G2            | yes | no  |
| 160 | 68 | 17.01.2013 | 157 | 7   | 14.10 | n/a | yes  | pT3b pN1 R0 G3a       | yes | no  |
| 161 | 68 | 18.01.2013 | 84  | 9   | 68.70 | 105 | yes  | pT4 pN1 M0 R1 G3      | yes | no  |
| 162 | 74 | 23.01.2013 | 166 | 7   | 4.24  | 69  | yes  | pT3b pN1 (1/19) M0 L1 | n/a | yes |
| 163 | 58 | 24.01.2013 | 76  | 6   | 0.51  | 70  | yes  | pT2b pN0 G2           | yes | no  |
| 164 | 59 | 25.01.2013 | 104 | n/a | 63.30 | n/a | no   | n/a                   | yes | no  |
| 165 | 77 | 28.01.2013 | 239 | 8   | 11.60 | 206 | nein | T2 N1 M0              | yes | no  |
| 166 | 70 | 28.01.2013 | 133 | 7   | 2.56  | 46  | nein | n/a                   | yes | no  |
| 167 | 77 | 29.01.2013 | 197 | 8   | 4.59  | 29  | yes  | pT2 pN0 M0            | yes | no  |
| 168 | 76 | 31.01.2013 | 183 | n/a | 76.60 | 66  | yes  | n/a                   | no  | yes |
| 169 | 76 | 04.02.2013 | 241 | 9   | 1.13  | 154 | yes  | pT3b, ypN0 (0/19), R0 | yes | no  |
| 170 | 63 | 05.02.2013 | 203 | 7   | 0.52  | n/a | yes  | pT3a pN0(0/3) Mx R1   | yes | yes |
| 171 | 78 | 06.02.2013 | 105 | 7   | 2.00  | n/a | yes  | pT3b pN0 G1 7 R1      | yes | yes |
| 172 | 68 | 08.02.2013 | 171 | 7   | 18.50 | 17  | no   | T2a                   | no  | no  |
| 173 | 63 | 11.02.2013 | 249 | 9   | 4.58  | n/a | yes  | pT3b pN1              | yes | no  |
| 174 | 66 | 12.02.2013 | 142 | 9   | 3.98  | n/a | no   | n/a                   | n/a | yes |
| 175 | 66 | 13.02.2013 | 122 | n/a | 3.75  | n/a | no   | n/a                   | yes | no  |
| 176 | 70 | 15.02.2013 | 186 | 7   | 2.77  | 86  | yes  | pT3a pN0 pMx V0 G3 R0 | yes | no  |
| 177 | 70 | 19.02.2013 | 140 | 7   | 2.59  | n/a | no   | pT1c N0 M0            | yes | no  |
| 178 | 81 | 20.02.2013 | 149 | n/a | 5.68  | 20  | yes  | pT3a pN0 M0 GII R1    | yes | no  |
| 179 | 68 | 21.02.2013 | 169 | 7   | 1.65  | 954 | no   | n/a                   | yes | no  |
| 180 | 79 | 22.02.2013 | 126 | 8   | 1.19  | n/a | yes  | pT2 pN0 R0            | yes | no  |
| 181 | 72 | 26.02.2013 | 125 | 8   | 2.60  | 39  | yes  | pT3a G3 pN0 pN1 R0    | no  | yes |
| 182 | 64 | 27.02.2013 | 132 | 9   | 2.70  | 52  | yes  | pT3 pN0 Pn1 R1(0)     | yes | no  |

|     |    |            |     |     |        |       |     |                          |     |     |
|-----|----|------------|-----|-----|--------|-------|-----|--------------------------|-----|-----|
| 183 | 76 | 28.02.2013 | 225 | 6   | 2.64   | 349   | no  | n/a                      | n/a | yes |
| 184 | 66 | 01.03.2013 | 169 | 8   | 7.01   | n/a   | yes | pt3b cN0 V0 L1 Pn1 G3 R1 | yes | no  |
| 185 | 72 | 05.03.2013 | 82  | n/a | 0.57   | n/a   | yes | pN0                      | no  | no  |
| 186 | 65 | 06.03.2013 | 131 | 7   | 191.00 | n/a   | yes | pT3b R1                  | yes | yes |
| 187 | 77 | 07.03.2013 | 205 | 6   | 7.00   | 169   | yes | pT1b N1 M0               | yes | no  |
| 188 | 64 | 08.03.2013 | 238 | 7   | 15.80  | 94    | no  | pT1c                     | yes | no  |
| 189 | 75 | 08.03.2013 | 217 | 8   | 2.62   | 20    | yes | pT2b pN1(3/34) R1        | yes | no  |
| 190 | 73 | 11.03.2013 | 222 | 9   | 104.00 | 47    | no  | n/a                      | no  | no  |
| 191 | 67 | 13.03.2013 | 169 | 8   | 2.40   | n/a   | yes | pT2c N0 R1               | yes | no  |
| 192 | 68 | 14.03.2013 | 187 | 9   | 7.20   | 2256  | yes | pT3b pN1 G3 R0           | yes | yes |
| 193 | 74 | 15.03.2013 | 194 | 8   | 14.80  | 30    | no  | n/a                      | no  | no  |
| 194 | 77 | 27.03.2013 | 120 | 7   | 29.70  | n/a   | yes | pT3a pN0 G3              | yes | no  |
| 195 | 72 | 28.03.2013 | 174 | n/a | 21.40  | n/a   | yes | n/a                      | no  | yes |
| 196 | 68 | 03.04.2013 | 244 | n/a | 4.10   | 30    | no  | n/a                      | no  | yes |
| 197 | 60 | 03.04.2013 | 100 | n/a | 275.00 | 33    | no  | n/a                      | no  | yes |
| 198 | 69 | 04.04.2013 | 160 | 8   | 33.50  | 155   | yes | pT3a, Nx, Mx, R1 G3a     | yes | no  |
| 199 | 71 | 08.04.2013 | 166 | 7   | 20.70  | n/a   | no  | n/a                      | no  | no  |
| 200 | 78 | 08.04.2013 | 121 | 8   | 21.70  | n/a   | yes | pT2a pN0 M0              | no  | no  |
| 201 | 70 | 08.04.2013 | 201 | 9   | 0.86   | 56    | yes | pT2 pN0 M0 R1            | no  | no  |
| 202 | 65 | 10.04.2013 | 107 | 7   | 2.13   | 19    | yes | pT3b pN0 pM0 pV0 pL1     | yes | no  |
| 203 | 53 | 10.04.2013 | 163 | 7   | 6.80   | n/a   | no  | pT1c pN1 G3              | no  | no  |
| 204 | 62 | 12.04.2013 | 249 | 9   | 1.88   | 99    | yes | n/a                      | no  | no  |
| 205 | 66 | 15.04.2013 | 149 | n/a | 0.63   | n/a   | yes | pT3b pN1 R1              | yes | no  |
| 206 | 61 | 18.04.2013 | 125 | n/a | 1.64   | 131   | yes | pT3a pN0 G2 R1           | yes | no  |
| 207 | 67 | 19.04.2013 | 115 | n/a | 47.40  | n/a   | no  | n/a                      | n/a | no  |
| 208 | 63 | 22.04.2013 | 240 | 9   | 3.20   | n/a   | no  | n/a                      | no  | no  |
| 209 | 73 | 23.04.2013 | 73  | 7   | 6.43   | 91    | no  | n/a                      | n/a | no  |
| 210 | 65 | 26.04.2013 | 222 | 7   | 0.82   | 74    | yes | n/a                      | yes | no  |
| 211 | 71 | 29.04.2013 | 84  | 6   | 2.61   | 1718  | yes | pT2 Nx Mx                | no  | no  |
| 212 | 64 | 29.04.2013 | 111 | n/a | 8.01   | 205   | no  | n/a                      | yes | no  |
| 213 | 64 | 03.05.2013 | 274 | 7   | 1.35   | 238   | yes | pT3a pN0                 | no  | no  |
| 214 | 71 | 08.05.2013 | 153 | 6   | 61.20  | n/a   | no  | n/a                      | no  | no  |
| 215 | 72 | 15.05.2013 | 185 | 7   | 5.40   | 6     | yes | pT3a pN0 M0 R0 G3        | yes | no  |
| 216 | 77 | 16.05.2013 | 119 | 7   | 3.22   | 51    | yes | pT2c pN0 M0 R0 G3        | no  | no  |
| 217 | 51 | 17.05.2013 | 240 | 7   | 0.78   | n/a   | yes | pT2c pN1(4/42) R1        | yes | yes |
| 218 | 62 | 22.05.2013 | 152 | 8   | 9.92   | 72    | no  | cT2c cN1 Mx St IV        | yes | yes |
| 219 | 62 | 23.05.2013 | 136 | 7   | 1.33   | n/a   | yes | pT3a G3 pN0 Pn1 R0       | no  | no  |
| 220 | 57 | 24.05.2013 | 195 | 7   | 4.49   | 241   | no  | pT2a T1c G2              | yes | no  |
| 221 | 67 | 28.05.2013 | 134 | 8   | 0.55   | 74    | yes | n/a                      | no  | no  |
| 222 | 68 | 29.05.2013 | 129 | 9   | 36.00  | 109   | no  | n/a                      | no  | no  |
| 223 | 70 | 04.06.2013 | 95  | 6   | 21.90  | 676   | no  | n/a                      | no  | no  |
| 224 | 63 | 05.06.2013 | 102 | 8   | 6.03   | 17    | yes | pT2c G3a                 | no  | no  |
| 225 | 69 | 06.06.2013 | 142 | 7   | 5.45   | n/a   | yes | pT3a pN0 R0 cM0          | yes | no  |
| 226 | 60 | 07.06.2013 | 120 | 7   | 267.00 | 53    | no  | n/a                      | no  | no  |
| 227 | 56 | 12.06.2013 | 112 | 7   | 4.91   | 795   | no  | n/a                      | n/a | no  |
| 228 | 63 | 13.06.2013 | 212 | 7   | 3.18   | 14612 | yes | n/a                      | yes | yes |
| 229 | 72 | 13.06.2013 | 160 | 5   | 7.40   | 143   | yes | pT2b pN0 M0              | yes | no  |

|     |    |            |     |     |       |      |     |                            |     |     |
|-----|----|------------|-----|-----|-------|------|-----|----------------------------|-----|-----|
| 230 | 61 | 14.06.2013 | 140 | 9   | 1.50  | n/a  | yes | n/a                        | yes | yes |
| 231 | 66 | 19.06.2013 | 82  | 9   | 0.59  | 55   | yes | pT3b pN1 (1/19) PN1        | yes | no  |
| 232 | 71 | 19.06.2013 | 125 | 7   | 0.80  | 378  | yes | pT2c pN0 R1 L0 V0          | no  | no  |
| 233 | 55 | 21.06.2013 | 180 | 7   | 25.93 | 33   | no  | pT3a pN1(4/17) R1 Pn1      | no  | no  |
| 234 | 66 | 24.06.2013 | 269 | n/a | 14.99 | 563  | no  | n/a                        | yes | no  |
| 235 | 65 | 24.06.2013 | 265 | 7   | 9.38  | 235  | yes | n/a                        | yes | no  |
| 236 | 57 | 26.06.2013 | 178 | 7   | 8.00  | n/a  | no  | n/a                        | no  | yes |
| 237 | 67 | 27.06.2013 | 104 | 7   | 0.39  | 16   | yes | T2b, cN0, cM0              | no  | no  |
| 238 | 70 | 28.06.2013 | 174 | 7   | 14.90 | n/a  | no  | T3b, pN0                   | no  | yes |
| 239 | 70 | 03.07.2013 | 66  | 8   | 1.05  | 29   | yes | pT2c M0 N0 V0 R0           | yes | no  |
| 240 | 71 | 09.07.2013 | 165 | 10  | 44.69 | 49   | no  | pT1c                       | yes | yes |
| 241 | 60 | 10.07.2013 | 267 | 6   | 3.78  | 103  | yes | pT3b pN1 R1 G3             | yes | yes |
| 242 | 63 | 11.07.2013 | 115 | 7   | 0.74  | n/a  | yes | pT2c pN0                   | no  | no  |
| 243 | 77 | 12.07.2013 | 129 | 7   | 1.04  | n/a  | no  | n/a                        | yes | yes |
| 244 | 69 | 17.07.2013 | 117 | 7   | n/a   | n/a  | yes | pT3b N0 pR1                | yes | no  |
| 245 | 75 | 18.07.2013 | 66  | 8   | 0.51  | n/a  | yes | T2 N0 M0                   | yes | no  |
| 246 | 80 | 23.07.2013 | 97  | 9   | 0.14  | 12   | no  | n/a                        | no  | no  |
| 247 | 64 | 27.07.2013 | 101 | 7   | 2.70  | 599  | yes | pT3a N0 M0 R0              | yes | yes |
| 248 | 53 | 25.07.2013 | 178 | 9   | 1.90  | 123  | yes | n/a                        | yes | no  |
| 249 | 65 | 26.07.2013 | 175 | 7   | 0.83  | n/a  | yes | pT3b pN1(2/13) M0 R0       | yes | yes |
| 250 | 58 | 30.07.2013 | 168 | 7   | 36.17 | n/a  | no  | n/a                        | no  | no  |
| 251 | 58 | 31.07.2013 | 87  | 9   | 0.38  | n/a  | yes | T3b, pN0 (0/33)            | no  | no  |
| 252 | 61 | 31.07.2013 | 147 | 9   | 1.35  | 309  | yes | pT3a N0 (0/8) M0 R1        | yes | no  |
| 253 | 76 | 01.08.2013 | 109 | 9   | 2.47  | 23   | no  | n/a                        | yes | no  |
| 254 | 61 | 05.08.2013 | 141 | 6   | 6.38  | n/a  | no  | n/a                        | no  | no  |
| 255 | 63 | 06.08.2013 | 313 | 8   | 0.27  | 849  | yes | pT3b pN0 M0 R0             | yes | no  |
| 256 | 65 | 06.08.2013 | 313 | 5   | 3.11  | n/a  | yes | pT3b pN1 R1 G3             | no  | no  |
| 257 | 72 | 07.08.2013 | 349 | 7   | 0.14  | 59   | yes | pT3b pN1 L1 (1/8) V1 R1 G3 | yes | yes |
| 258 | 72 | 07.08.2013 | 261 | 7   | 2.38  | 205  | yes | pT3a                       | yes | yes |
| 259 | 71 | 08.08.2013 | 345 | 7   | 1.85  | n/a  | yes | n/a                        | yes | yes |
| 260 | 60 | 08.08.2013 | 375 | 7   | 0.48  | 1221 | yes | n/a                        | yes | no  |
| 261 | 63 | 12.08.2013 | 259 | 7   | 0.14  | n/a  | yes | pT2a pN0 cM0 R0            | no  | no  |
| 262 | 73 | 13.08.2013 | 261 | 8   | 16.00 | n/a  | no  | n/a                        | yes | no  |
| 263 | 65 | 13.08.2013 | 304 | 9   | 5.21  | 30   | no  | pT4, pN1 (1/15), pn1, R1   | yes | yes |
| 264 | 57 | 13.08.2013 | 364 | 7   | 8.16  | 257  | yes | pT3a pN1 cM0 Pn1 L1 R1     | yes | no  |
| 265 | 71 | 14.08.2013 | 317 | 8   | 1.40  | 333  | yes | pT2b pN0 R0 G3 a, pN1      | yes | no  |
| 266 | 66 | 14.08.2013 | 400 | 7   | 0.10  | 50   | yes | pT2c, pN0, R1              | no  | no  |
| 267 | 76 | 15.08.2013 | 314 | 9   | 2.35  | 131  | yes | pT3b pN1 (3/7) L1 M0       | yes | yes |
| 268 | 75 | 15.08.2013 | 388 | 7   | 2.81  | 190  | no  | cT3b cN0 M0 G3             | yes | no  |
| 269 | 74 | 16.08.2013 | 283 | 9   | 3.96  | 46   | yes | n/a                        | no  | no  |
| 270 | 77 | 19.08.2013 | 345 | 8   | 1.29  | 255  | yes | pT2a N0                    | yes | no  |
| 271 | 72 | 20.08.2013 | 338 | 9   | 7.80  | n/a  | no  | T2c cN0                    | no  | no  |
| 272 | 73 | 23.08.2013 | 269 | 7   | 3.21  | 76   | yes | pT2                        | yes | no  |
| 273 | 73 | 28.08.2013 | 241 | 7   | 6.00  | n/a  | yes | pT2b pN0 M0                | no  | no  |
| 274 | 68 | 28.08.2013 | 190 | 9   | 4.10  | 28   | yes | pT4, pN1, L1, M0, R0       | no  | no  |
| 275 | 56 | 29.08.2013 | 253 | 7   | 2.39  | 445  | yes | pT3b pN0                   | yes | no  |
| 276 | 73 | 04.09.2013 | 334 | 7   | 21.13 | 125  | yes | pT3b, pN0, G3a             | yes | yes |

|     |    |            |     |     |          |      |     |                            |     |     |
|-----|----|------------|-----|-----|----------|------|-----|----------------------------|-----|-----|
| 277 | 78 | 05.09.2013 | 336 | 5   | 4.08     | 1225 | yes | pT2 N0 G2a                 | yes | no  |
| 278 | 54 | 10.09.2013 | 218 | 7   | 1.14     | 75   | yes | pT2a pN0 M0 G3             | yes | no  |
| 279 | 73 | 11.09.2013 | 236 | n/a | 13.84    | n/a  | no  | n/a                        | no  | no  |
| 280 | 75 | 12.09.2013 | 322 | 7   | 15.29    | 12   | yes | n/a                        | no  | no  |
| 281 | 77 | 16.09.2013 | 68  | n/a | 2.43     | 23   | yes | n/a                        | no  | no  |
| 282 | 57 | 17.09.2013 | 188 | 7   | 5.08     | 1399 | no  | n/a                        | no  | no  |
| 283 | 81 | 18.09.2013 | 233 | 7   | 0.14     | n/a  | yes | pT3a, pN0, Mx, R0          | no  | no  |
| 284 | 55 | 20.09.2013 | 246 | 9   | 39.17    | 137  | no  | cT4, cN1, cM1b, G3         | n/a | yes |
| 285 | 67 | 24.09.2013 | 268 | 8   | 0.28     | 261  | yes | pT2c pN0(0/11) M0 R0       | no  | no  |
| 286 | 67 | 24.09.2013 | 116 | 7   | 2.80     | 35   | yes | pT2b, pN0, M0, GII         | yes | no  |
| 287 | 53 | 25.09.2013 | 126 | 7   | 1.35     | n/a  | yes | pT3b N0 R1                 | no  | yes |
| 288 | 71 | 25.09.2013 | 305 | 8   | 2.70     | n/a  | yes | pT3a pN0                   | yes | yes |
| 289 | 62 | 27.09.2013 | 292 | 7   | 24.73    | 373  | yes | n/a                        | yes | no  |
| 290 | 72 | 27.09.2013 | 229 | 9   | 9.12     | 43   | yes | pT3b pN1 cM0 G3 R1         | no  | yes |
| 291 | 63 | 02.10.2013 | 240 | 6   | 0.62     | 122  | yes | pT2c pN0 G2                | yes | yes |
| 292 | 66 | 04.10.2013 | 312 | 6   | 8.62     | n/a  | no  | n/a                        | no  | no  |
| 293 | 69 | 09.10.2013 | 223 | 9   | 1.01     | 45   | yes | pT3a N0 cM0 L1 V0 R0 G3    | no  | no  |
| 294 | 62 | 14.10.2013 | 217 | 9   | 139.00   | 56   | yes | pT4 pN1 (8/15) R1 L1       | no  | yes |
| 295 | 74 | 22.10.2013 | 223 | 9   | 41395.00 | 10   | yes | pT3b pN1                   | no  | yes |
| 296 | 58 | 28.10.2013 | 251 | n/a | 17.00    | 108  | no  | n/a                        | no  | no  |
| 297 | 65 | 15.11.2013 | 156 | 7   | 0.81     | n/a  | yes | n/a                        | yes | no  |
| 298 | 72 | 18.11.2013 | 252 | 7   | 7.63     | n/a  | yes | pT2a G2b M0 Nx             | yes | no  |
| 299 | 72 | 20.11.2013 | 275 | 9   | 113.81   | 206  | yes | pT2a G3 pNx pMx            | n/a | yes |
| 300 | 73 | 22.11.2013 | 200 | 9   | 18.97    | 263  | yes | n/a                        | no  | no  |
| 301 | 78 | 25.11.2013 | 204 | 7   | 4.77     | 959  | yes | n/a                        | no  | no  |
| 302 | 74 | 25.11.2013 | 230 | n/a | 17.09    | 96   | yes | pT3b pN1 (18/47) R1 L1 Pn1 | no  | no  |
| 303 | 76 | 26.11.2013 | 250 | 6   | 7.24     | 68   | yes | n/a                        | n/a | no  |
| 304 | 79 | 26.11.2013 | 163 | 9   | 3.20     | n/a  | yes | pT3a pN0 cM0               | yes | no  |
| 305 | 64 | 03.12.2013 | 220 | 7   | 10.76    | 621  | yes | pT2a N0                    | no  | no  |
| 306 | 46 | 03.09.2013 | 200 | n/a | n/a      | n/a  | no  | n/a                        | no  | no  |
| 307 | 60 | 10.12.2013 | 336 | 7   | 1.82     | n/a  | yes | pT3b pN0 Mx                | yes | no  |
| 308 | 72 | 11.12.2013 | 102 | 7   | 1.8      | 349  | yes | pT2c pN1 M0 G3             | yes | no  |
| 309 | 69 | 11.12.2012 | 200 | n/a | 4.39     | 292  | no  | n/a                        | no  | no  |
| 310 | 68 | 12.12.2013 | 177 | 7   | 0.64     | 223  | yes | n/a                        | no  | no  |
| 311 | 72 | 13.12.2013 | 277 | 6   | 3.77     | n/a  | no  | pT1c                       | yes | no  |
| 312 | 65 | 19.12.2013 | 170 | 7   | 1.49     | 1323 | yes | pT3b                       | yes | no  |
| 313 | 71 | 17.12.2013 | 222 | 5   | 0.77     | n/a  | yes | pT2 pN0 cM0 G2             | no  | no  |
| 314 | 68 | 09.01.2014 | 163 | n/a | 12.9     | n/a  | yes | n/a                        | yes | no  |
| 315 | 57 | 09.01.2014 | 227 | 8   | 13.63    | n/a  | no  | n/a                        | n/a | yes |
| 316 | 76 | 10.01.2014 | 264 | n/a | 7.44     | n/a  | no  | n/a                        | no  | no  |
| 317 | 72 | 10.01.2014 | 194 | n/a | 313.13   | n/a  | n/a | n/a                        | n/a | no  |
| 318 | 72 | 15.01.2014 | 168 | n/a | 21.25    | n/a  | yes | n/a                        | no  | no  |
| 319 | 75 | 28.01.2014 | 221 | 7   | n/a      | n/a  | yes | pT2c N0 M0 R0 L0 V0        | no  | no  |
